# Supplementary material for: Modeling Parkinson’s Disease Neuropathology and Symptoms by Intranigral Inoculation of Preformed Human α-Synuclein Oligomers
Source: MDPI journal article supplement (doi:10.3390/ijms21228535), 2020-11-12
Supplement: s1 [file s1]

## Supplementary Figures

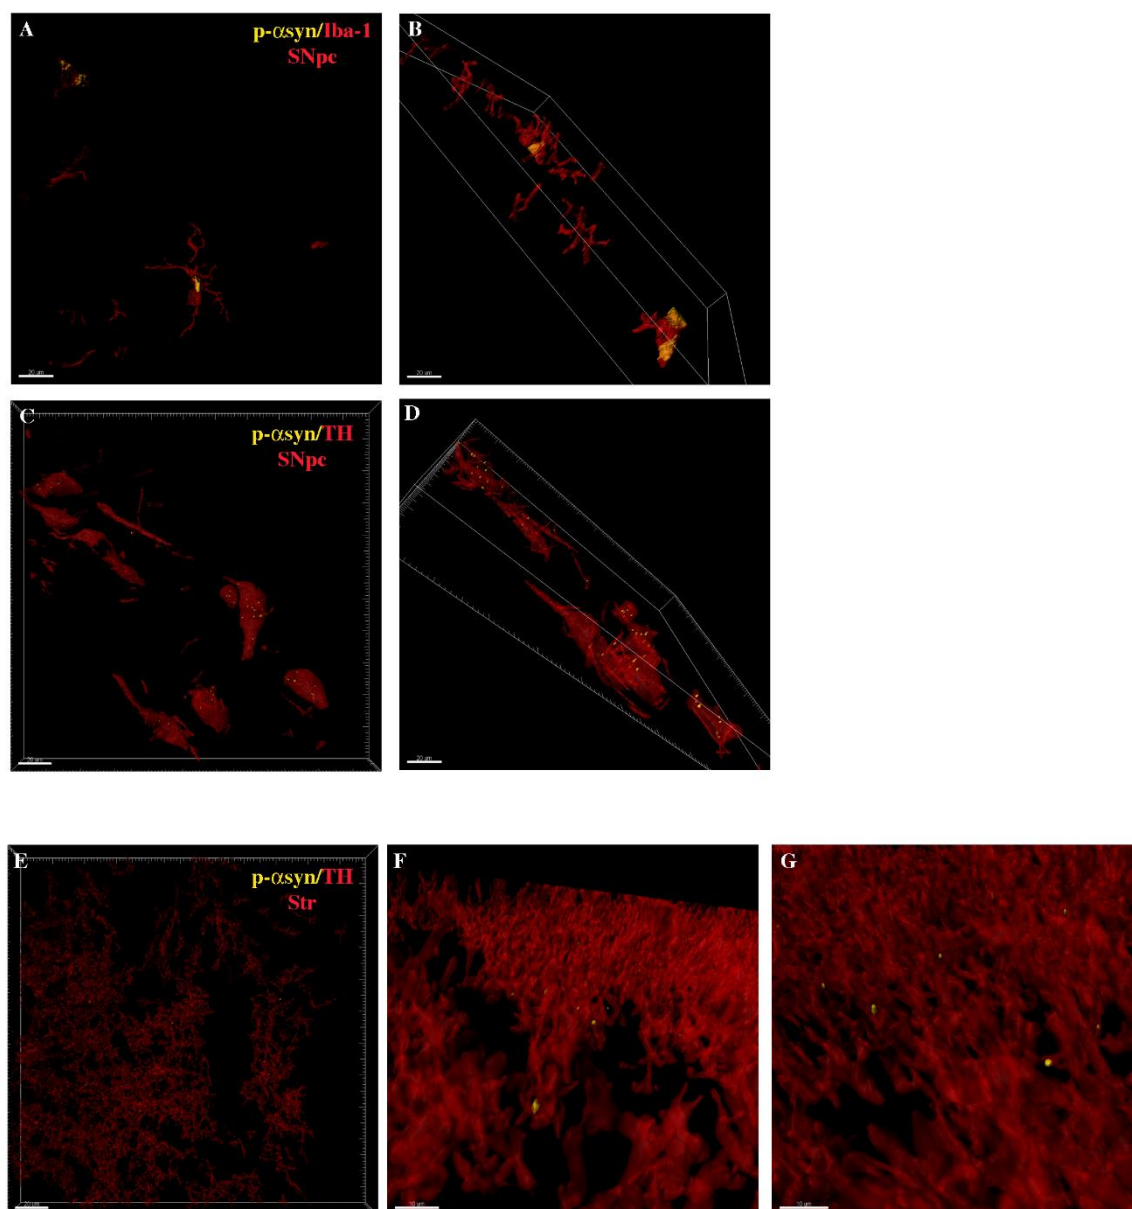

**Figure S1.** 3D reconstruction of colocalization of p129-αSyn (yellow) with Iba-1 (red, A-B) or TH cell bodies (red, C-D) and fibers (E-G), revealed by surface rendering algorithm in SNpc. To evaluate the p129-αSyn primary and secondary antibodies penetration into the cell, the image stack was rotated of about 45° (B, D) or 9° (F, G) in the Y-axis. All scales are expressed in μm.

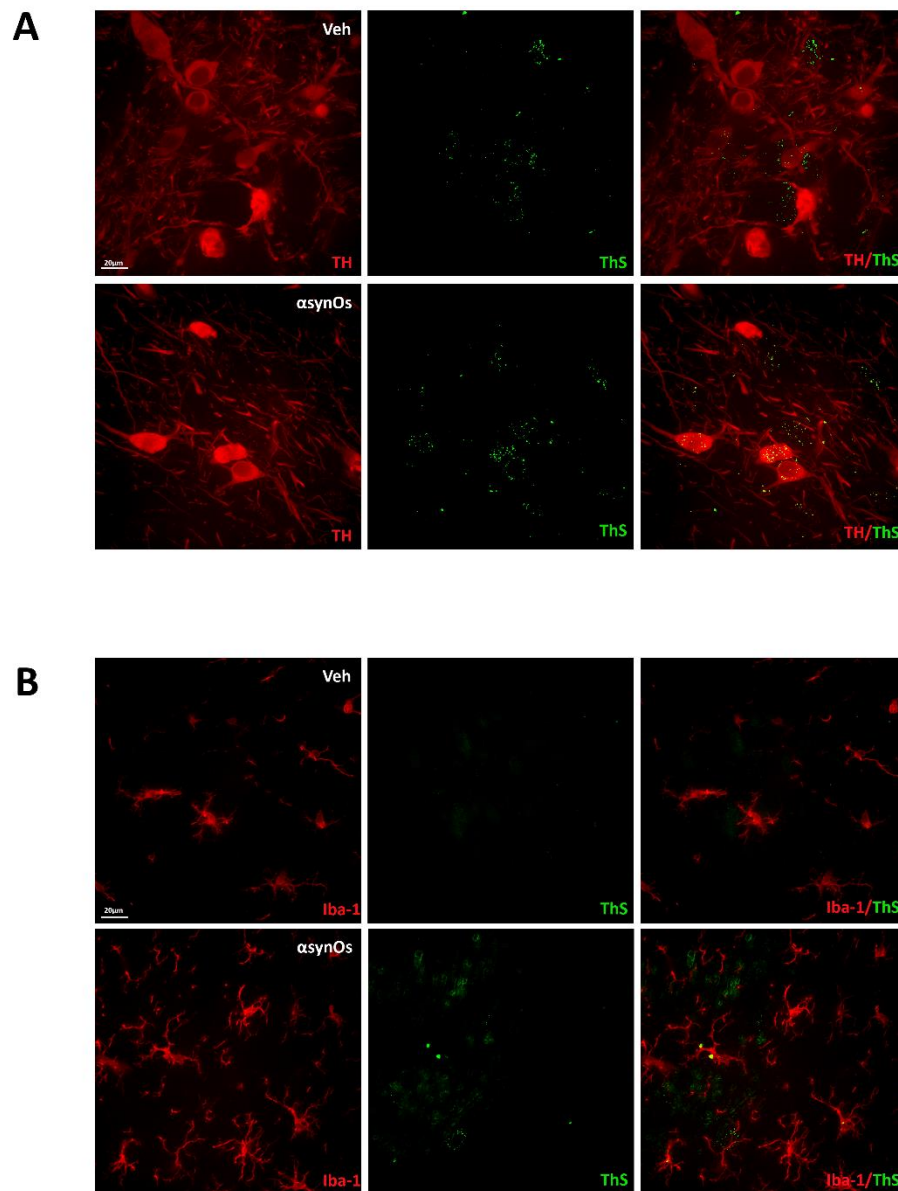

**Figure S2. Thioflavin-S signal in TH-positive and Iba-1 positive cells.** Representative confocal images from the Substantia Nigra pars compacta (SNpc) of vehicle or H- $\alpha$ SynOs-infused rats. Thioflavin-S aggregates (green) are shown in TH<sup>+</sup> neurons (red in A panels) and Iba-1 positive cells (red in B panels). Scale bar: 20  $\mu$ m.

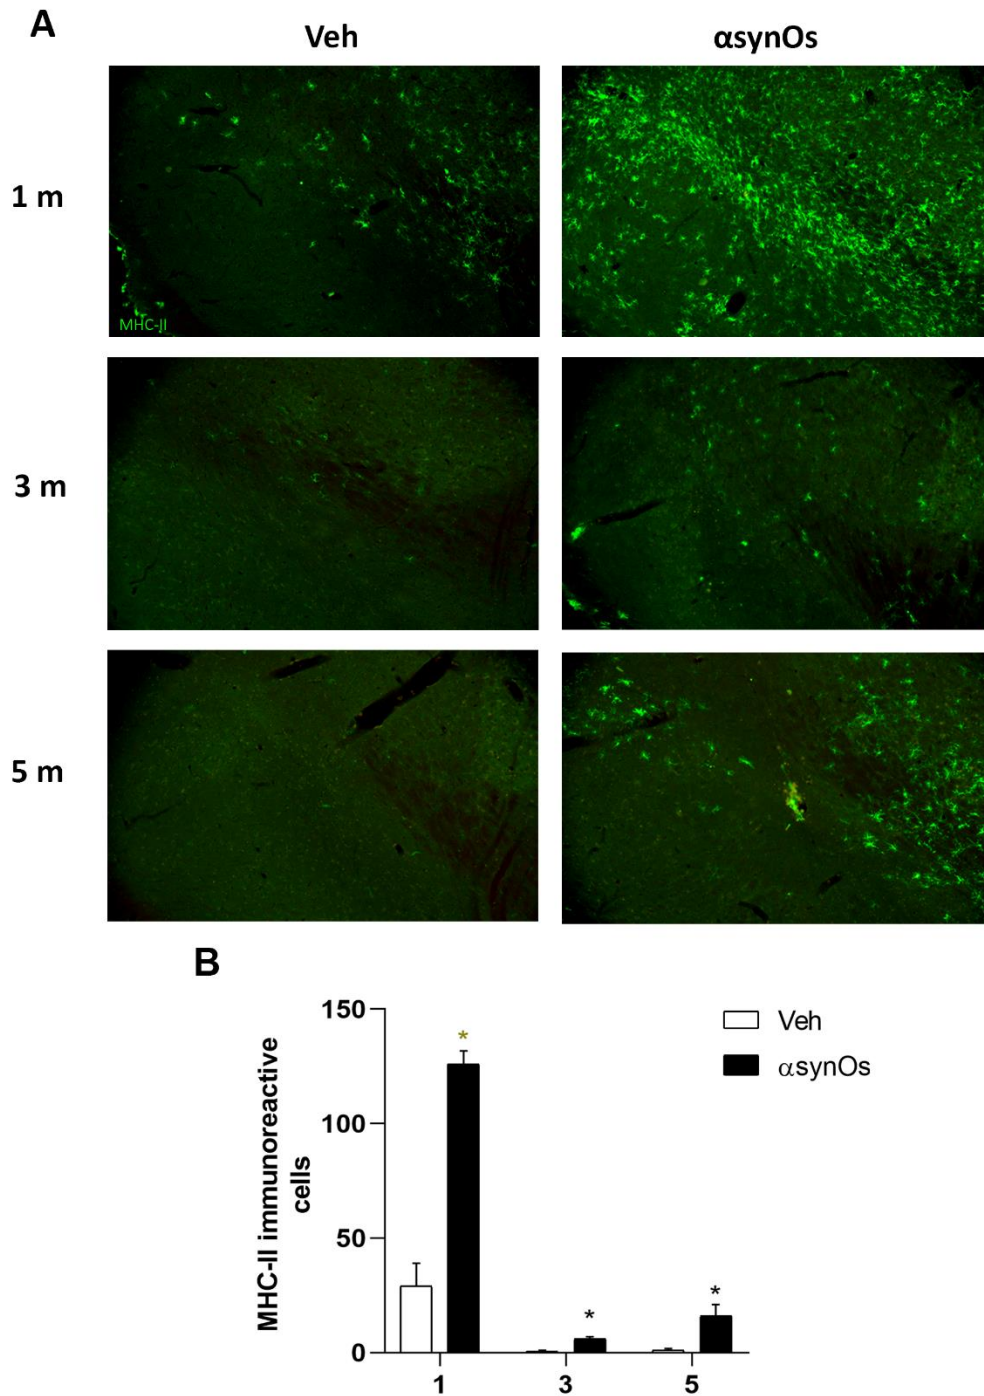

**Figure S3.** Representative images of MHC-II immunofluorescence (A) and quantification of MHC-II-immunoreactive cells (B) in the SNpc from vehicle or H- $\alpha$ SynO-infused rats (A). Values represent the mean  $\pm$  SEM. \* $p < 0.01$  vs corresponding vehicle one, three or five months post infusion, by t-test ( $n = 4/5$  per group).
